# Supplementary material
Source: publisher figshare collection journal article supplement (https://frontiersin.figshare.com/ndownloader/files/13015541)
Supplement: Supplementary file [file 13015541]

## *Supplementary Material*

### ***Mycolicibacterium smegmatis*, basonym *Mycobacterium smegmatis*, expresses morphological phenotypes much more similar to *Escherichia coli* than *Mycobacterium tuberculosis* in quantitative structome analysis and CryoTEM examination**

Hiroyuki Yamada<sup>1\*</sup>, Masashi Yamaguchi<sup>2</sup>, Yuriko Igarashi<sup>1</sup>, Kinuyo Chikamatsu<sup>1</sup>, Akio Aono<sup>1</sup>, Yoshiro Murase<sup>1</sup>, Yuta Morishige<sup>1</sup>, Akiko Takaki<sup>1</sup>, Hiroji Chibana<sup>2</sup>, Satoshi Mitarai<sup>1,3</sup>

<sup>1</sup> Department of Mycobacterium Reference and Research, the Research Institute of Tuberculosis, Japan Anti-Tuberculosis Association, Kiyose, Tokyo, 204-8533, Japan

<sup>2</sup> Medical Mycology Research Center, Chiba University, Chiba, 260-8673, Japan.

<sup>3</sup> Department of Basic Mycobacteriology, Graduate School of Biomedical Sciences, Nagasaki University, Nagasaki, Japan.

**\* Correspondence:**

Dr. Hiroyuki Yamada

[hyamada@jata.or.jp](mailto:hyamada@jata.or.jp)

**Running title:** Structome analysis of *M. smegmatis*.

**Keywords:** *Mycolicibacterium smegmatis*, *Mycobacterium tuberculosis*, structome analysis, cryofixation, freeze-substitution, serial ultra-thin sectioning, transmission electron microscopy, ribosome enumeration.

## *Supplementary Videos*

**Supplementary Video S1:** A total of 38 serial ultrathin sections for Cell 1 were shown in slide show.

**Supplementary Video S2:** A total of 44 serial ultrathin sections for Cell 2 were shown in slide show.

**Supplementary Video S3:** A total of 21 serial ultrathin sections for Cell 3 were shown in slide show.

**Supplementary Video S4:** A total of 19 serial ultrathin sections for Cell 4 were shown in slide show.

**Supplementary Video S5:** A total of 35 and 28 serial ultrathin sections for Cell 5 (right) and Cell 6 (left) were shown in slide show, respectively.

**Supplementary Video S6:** A total of 35 serial ultrathin sections for Cell 7 were shown in slide show.

**Supplementary Video S7:** 3-dimensional reconstruction of Cell 1 based on 38 serial ultrathin sections.

**Supplementary Video S8:** 3-dimensional reconstruction of Cell 2 based on 44 serial ultrathin sections.

**Supplementary Video S9:** 3-dimensional reconstruction of Cell 3 based on 21 serial ultrathin sections.

**Supplementary Video S10:** 3-dimensional reconstruction of Cell 4 based on 19 serial ultrathin sections.

**Supplementary Video S11:** 3-dimensional reconstruction of Cell 5 (red) and Cell 6 (purple) based on 35 and 28 serial ultrathin sections, respectively.

**Supplementary Video S12:** 3-dimensional reconstruction of Cell 7 based on 35 serial ultrathin sections.

## *References*

- Yamada, H., Mitarai, S., Chikamatsu, K., Mizuno, K., Yamaguchi, M. (2010). Novel freeze-substitution electron microscopy provides new aspects of virulent *Mycobacterium tuberculosis* with visualization of the outer membrane and satisfying biosafety requirements. *J Microbiol Methods*. 80, 14-18. doi: 10.1016/j.mimet.2009.09.022.
- Yamada, H., Bhatt, A., Danev, R., Fujiwara, N., Maeda, S., Mitarai, S., Chikamatsu, K., Aono, A., Nitta, K., Jacobs, W. R., Jr., and Nagayama, K. (2012). Non-acid-fastness in *Mycobacterium tuberculosis* *ΔkasB* mutant correlates with the cell envelope electron density. *Tuberculosis*. 92, 351-357. doi: 10.1016/j.tube.2012.02.006.
